# Supplementary material for: Introgression of QTL Hotspot Regions Enhances Grain Yield and Maize Lethal Necrosis Resistance in Elite Maize Lines
Source: Research Square preprint supplement (doi:10.21203/rs.3.rs-7815596/v1), 2025-11-05
Supplement: Supplementary file 1 [file a745f8ff8714ad63cdf918f5.xlsx]

## Sheet: Table S1_Haplotypes
Supplementary Table S1. Details of the trait linked SNPs/haplotypes Including Chromosome, Physical Position, and Allele Composition Across Donor Parents, Recurrent Parent, and Introgressed Lines Used in This Study
SNP_Name	PZA02299_16	PZA00363_7	S3_133048570	PZD00015_5	S3_146250249	S3_146363360	S3_146602134	PZA03047_12	S6_21007530	S6_21008211
Chromosome	3	3	3	3	3	3	3	6	6	6
Physical position (Mbp)	130.08	132.19	133.05	133.48	146.25	146.36	146.6	20.84	21.01	21.01
Haplotype_Name	qMLN3_133				qMLN3_146			qMLN6_021
DP-CML543	AA	GG	CC	AA	TT	CC	TT	GG	GG	CC
RP-CML202	GG	AA	TT	AA	TT	CC	TT	AA	AA	TT
CML202LNT1	AA	GG	CC	AA	TT	CC	TT	GG	GG	CC
CML202LNT2	AA	GG	CC	AA	TT	CC	TT	GG	GG	CC
CML202LNT3	AA	GG	CC	AA	TT	CC	TT	GG	GG	CC
DP-CML543	AA	GG	CC	AA	TT	CC	TT	GG	GG	CC
RP-CML489	GG	AA	CC	AA	TT	CC	TT	GG	AA	TT
CML489LNT1	AA	GG	CC	AA	TT	CC	TT	GG	GG	CC
CML489LNT2	AA	GG	CC	AA	TT	CC	TT	GG	GG	CC
DP-CML543	AA	GG	CC	AA	TT	CC	TT	GG	GG	CC
RP-CML546	GG	GG	CC	AA	TT	TT	TT	GG	AA	TT
CML546LNT1	AA	GG	CC	AA	TT	CC	TT	GG	GG	CC
CML546LNT2	AA	GG	CC	AA	TT	CC	TT	GG	GG	CC
DP-CML543	AA	GG	CC	AA	TT	CC	TT	GG	GG	CC
RP-CZL052	GG	AA	CC	AA	GG	TT	TT	GG	GG	TT
CZL052LNT1	AA	GG	CC	AA	TT	CC	TT	GG	GG	CC
CZL052LNT2	AA	GG	CC	AA	TT	CC	TT	GG	GG	CC
DP-CML543	AA	GG	CC	AA	TT	CC	TT	GG	GG	CC
RP-CML444	GG	GG	TT	AA	GG	TT	CC	GG	AA	TT
CML444LNT1	AA	GG	CC	AA	TT	CC	TT	GG	GG	CC
CML444LNT2	AA	GG	CC	AA	TT	CC	TT	GG	GG	CC
DP-CML543	AA	GG	CC	AA	TT	CC	TT	GG	GG	CC
RP-CML574	AA	AA	CC	AA	GG	TT	TT	GG	AA	TT
CML574LNT1	AA	AA	CC	AA	TT	CC	TT	GG	AA	TT
CML574LNT2	AA	AA	CC	AA	TT	CC	TT	GG	AA	TT
DP-CML543	AA	GG	CC	AA	TT	CC	TT	GG	GG	CC
RP-CLRCY034	AA	AA	CC	AA	GG	TT	TT	GG	AA	TT
CLRCY034LNT1	AA	AA	CC	AA	GG	TT	TT	GG	GG	CC
CLRCY034LNT2	AA	AA	CC	AA	GG	TT	TT	GG	GG	CC
DP-CML574	AA	AA	CC	AA	GG	TT	TT	GG	AA	TT
RP-CML444	GG	GG	TT	AA	GG	TT	CC	GG	AA	TT
CML444LNT1	AA	AA	CC	AA	GG	TT	TT	GG	AA	TT
CML444LNT2	AA	AA	CC	AA	GG	TT	TT	GG	AA	TT
DP-CLRCY034	AA	AA	CC	AA	GG	TT	TT	GG	AA	TT
RP-CML507	GG	AA	CC	AA	TT	CC	TT	AA	AA	TT
CML507LNT1	AA	AA	CC	AA	GG	TT	TT	AA	AA	TT
CML507LNT2	AA	AA	CC	AA	GG	TT	TT	AA	AA	TT
DP-CLYN261	AA	AA	CC	AA	GG	TT	TT	AA	AA	TT
RP-CML312	GG	AA	CC	GG	TT	CC	TT	AA	AA	TT
CML312LNT1	AA	AA	CC	AA	GG	TT	TT		AA	TT
CML312LNT2	AA	AA	CC	AA	GG	TT	TT	AA	AA	TT
DP-CLYN261	AA	AA	CC	AA	GG	TT	TT	AA	AA	TT
RP-CML540	GG	AA	TT	GG	TT	CC	TT	AA	AA	TT
CML540LNT1	AA	AA	CC	AA	GG	TT	TT	AA	AA	TT
CML540LNT1	AA	AA	CC	AA	GG	TT	TT	AA	AA	TT
DP-CLYN261	AA	AA	CC	AA	GG	TT	TT	AA	AA	TT
RP-CML544	GG	AA	CC	AA	GG	TT	TT	AA	AA	TT
CML544LNT1	AA	AA	CC	AA	GG	TT	TT	AA	AA	TT
CML544LNT2	AA	AA	CC	AA	GG	TT	TT	AA	AA	TT
DP-CLYN261	AA	AA	CC	AA	GG	TT	TT	AA	AA	TT
RP-DTPF67	AA	GG	CC	AA	TT	CC	TT	GG	GG	TT
DTPF67LNT1	AA	AA	CC	AA	GG	TT	TT	GG	GG	TT
DTPF67LNT2	AA	AA	CC	AA	GG	TT	TT	GG	GG	TT
DP-CLYN261	AA	AA	CC	AA	GG	TT	TT	AA	AA	TT
RP-LPSF64	GG	AA	TT	AA	GG	TT	TT	GG	GG	TT
LPSF64LNT1	AA	AA	CC	AA	GG	TT	TT	GG	GG	TT
DP-CML564	AA	GG	CC	AA	TT	CC	TT	GG	AA	TT
RP-LPSF64	GG	AA	TT	AA	GG	TT	TT	GG	GG	TT
LPSF64LNT1	AA	GG	CC	AA	TT	CC	TT	GG	GG	TT
LPSF64LNT2	AA	GG	CC	AA	TT	CC	TT	GG	GG	TT
DP-CML564	AA	GG	CC	AA	TT	CC	TT	GG	AA	TT
RP-CML539	GG	AA	TT	AA	TT	TT	TT	AA	AA	TT
CML539LNT1	AA	GG	CC	AA	TT	TT	TT	AA	AA	TT
CML539LNT2	AA	GG	CC	AA	TT	TT	TT	AA	AA	TT

## Sheet: Table S2_RRPG
Supplementary Table S2: The total number of markers used for recovery of recurrent parent genome and percentage of recovery of recurrent parent genome at BC4F3 lines
Line	# of markers used	% Data	RPP Total
CML312	1160	100	1
CLYN261	1160	100	0
CML312LNT1	1160	100	0.850346
CML312LNT2	1160	100	0.881946
CML540	942	100	1
CLYN261	942	100	0
CML540LNT1	942	100	0.7799
CML540LNT2	942	100	0.7799
CML544	1157	100	1
CLYN261	1157	100	0
CML544LNT1	1157	100	0.824359
CML544LNT2	1157	100	0.879824
DTPWC9-F67	1157	100	1
CLYN261	1157	100	0
DTPWF67LNT1	1157	100	0.84034
DTPWF67LNT2	1157	100	0.665328
LPSC7-F64	942	100	1
CLYN261	942	100	0
LPSC7-F64LNT1	942	100	0.7799
LPSC7-F64LNT2
LPSC7-F64	942	100	1
DTPYF46	942	100	0
LPSC7-F64LNT1	942	100	0.7799
LPSC7-F64LNT2	942	100	0.850346
CML539	1157	100	1
DTPYF46	1157	100	0
CML539LNT1	1157	100	0.876543
CML539LNT2	1157	100	0.850346
CML202	1119	100	1
CML543	1119	100	0
CML202LNT1	1119	100	0.900875
CML202LNT2	1119	100	0.926385
CML489	1116	100	1
CML543	1116	100	0
CML489LNT1	1116	100	0.557547
CML489LNT2	1116	100	0.6
CML546	1141	100	1
CML543	1141	100	0
CML546LNT1	1141	100	0.782886
CML546LNT2	1141	100	0.879949
CML574	1146	100	1
CML543	1146	100	0
CML574SR-W1LNT1	1146	100	0.83476
CML574SR-W2LNT2	1146	100	0.839559
CZL052	918	100	1
CML543	918	100	0
CZL052LNT1	918	100	0.827684
CZL052LNT2	918	100	0.82
CLYCR034	1142	100	1
CML543	1142	100	0
CLYCR034SR-W1LNT1	1142	100	0.896239
CLYCR034SR-W2LNT2	1142	100	0.873541
CML444	1158	100	1
CML543	1158	100	0
CML444LNT1	1158	100	0.88598
CML444LNT2	1158	100	0.88
CML444	1158	100	1
CML574	1158	100	0
CML444LNT1	1158	100	0.859454
CML444LNT2	1158	100	0.88
CML507	1160	100	1
CLYCR034	1160	100	0
CML507LNT1	1160	100	0.863415
CML507LNT2	1160	100	0.85

## Sheet: Table S3_MABC-1-site1-Naivasha
	Supplementary Table S3. Analyses of variance and Mean Performance of Testcross Hybrids from Recurrent Parent, Donor Parent, and Introgression Lines Evaluated for MLN Disease Severity, Grain Yield, and Agronomic Traits under Artificial MLN Inoculation in Naivasha in Kenya
				Grain Yield		Plant height	Ear height	Ear position	Ears/ plant	Ear rot	Grain moisture	Num plants	Ear aspect	MLN disease severity
				GW	FW	PH	EH	EPO	EPP	ER	MOI	No	EAS	MLN1	MLN2	MLN3	MLN4
LOC	Heterotic group	Pedigree (Line + tester)	Picked	t/ha1	t/ha	cm	cm	0-1	#	%	%	#	1-5	1-9	1-9	1-9	1-9
NAIVASHA	B	CML543 + CKDHL120918	1	3.1	2.9	183	100	0.5	1.2	12	22.2	8	3	2.33	2.67	3	3
NAIVASHA	B	CML543 + CKDHL120918	2	6	5.6	200	106	0.5	1.3	4	23.4	8.7	2.3	2	3	3.67	3.67
NAIVASHA	B	CML543 + CKDHL120918	3	3.1	2.9	183	100	0.5	1.2	12	22.2	8	3	2.33	2.67	3	3
NAIVASHA	B	CML543 + CKDHL120918	4	5.3	4.5	189	116	0.6	1.3	16	24.2	9.7	3	2	2.67	4	4
NAIVASHA	B	CML543 + CKDHL120918	5	6.4	5.9	197	105	0.6	1.4	12	22.9	10	2.7	2	2.67	3.67	3.67
NAIVASHA	B	CML202 + CKDHL120918	6	3.2	3	183	90	0.5	0.8	27	22.6	11	3.3	2.67	3.67	4.67	4.67
NAIVASHA	B	CML202 + CKDHL120918	7	4.4	3.9	176	93	0.5	1.2	21	21.6	9.7	3.7	2.67	3.67	4	4.33
NAIVASHA	B	(CML202*5/CML543):B>0113>0302>0261>0292-1113 + CKDHL120918	8	5.6	5.7	192	100	0.5	1.4	9	24	10	2.3	2	2.67	4	4
NAIVASHA	B	(CML202*5/CML543):B>0113>0302>0261>0292-1127 + CKDHL120918	9	6	5.5	193	89	0.5	1.4	10	22.5	9.7	2.7	2	3	3.33	3.33
NAIVASHA	B	(CML202*5/CML543):B>0113>0302>0261>0292-1131 + CKDHL120918	10	5	5.5	202	105	0.5	1.3	13	21.4	10	2.3	2	2.33	3	3
NAIVASHA	B	CML489 + CKDHL120918	11	0.6	0.7	184	101	0.5	0.4	67	21	9.7	4.3	2	3	3.67	4.33
NAIVASHA	B	CML489 + CKDHL120918	12	0.2	0.4	175	95	0.6	0.2	67	21.7	9.3	4	2.33	3	3.67	4.33
NAIVASHA	B	(CML489*5/CML543):B>0187>0235>0232>0274-1131 + CKDHL120918	13	4	3.6	187	100	0.5	1.1	26	22.8	9.7	3.3	2	2	3	3
NAIVASHA	B	(CML489*5/CML543):B>0187>0235>0232>0274-1142 + CKDHL120918	14	3.8	3.7	193	103	0.5	1.3	17	22.6	9	3.7	2	2.67	3.33	3.33
NAIVASHA	B	CML546 + CKDHL120918	15	1.3	1.4	180	98	0.6	1.1	58	24.2	9.7	4.7	2.67	4.33	5.33	5.67
NAIVASHA	B	CML546 + CKDHL120918	16	1.9	2.2	180	103	0.6	1.1	34	23.4	10	4.7	3	3.67	5	5.67
NAIVASHA	B	(CML546*5/CML543):B>0127>0034>0040>0060-1219 + CKDHL120918	17	4.3	4.2	210	122	0.6	1	44	21.8	9.7	3.7	2.67	3	3.33	3.67
NAIVASHA	B	(CML546*5/CML543):B>0004>0233>0208>0228-1151 + CKDHL120918	18	3.5	3.3	191	105	0.5	1	42	23.2	10.3	4	2.33	2.67	4	4
NAIVASHA	B	CML574 + CKDHL120918	19	5.6	5.4	186	108	0.6	1.1	8	22.6	9.7	2.3	2	2	3	3
NAIVASHA	B	CML574 + CKDHL120918	20	6.7	6.1	195	113	0.6	1.1	19	21.6	10.3	2.3	2	2.33	3	3
NAIVASHA	B	CML574 + CKDHL120918	21	6.6	6.2	212	130	0.6	1.3	5	21.3	10.3	2	2	2	3	3
NAIVASHA	B	CML574 + CKDHL120918	22	6.6	6.4	208	117	0.6	1.1	3	23.4	10.7	2	2	2	3	3.33
NAIVASHA	B	(CML574*5/CML543):B>0177>0214>0198>0353-1126 + CKDHL120918	23	7.6	7.5	216	126	0.6	1.2	0	21.2	10.7	1.7	2	2.33	3	3
NAIVASHA	B	(CML574*5/CML543):B>0154>0157>0168>0327-1086 + CKDHL120918	24	6.9	6.2	205	116	0.6	1.2	11	20.5	10.3	1.7	2	2	3.33	3.67
NAIVASHA	B	(CML574*5/CML543):B>0019>0074>0103>0160-1034 + CKDHL120918	25	7.5	7.2	210	123	0.6	1.3	0	21.7	10.7	1.7	2	2	3	3
NAIVASHA	B	CZL052 + CKDHL120918	26	0.9	1	182	111	0.6	0.5	36	21	9.7	4.3	2.33	3.33	4.33	4.67
NAIVASHA	B	CZL052 + CKDHL120918	27	3	2.9	192	108	0.6	0.5	50	21	9.7	3.7	2	3	4	4
NAIVASHA	B	(CZL052*3/CML543):B>0050>0080>0098>0092-1044 + CKDHL120918	28	4.8	4.6	206	125	0.6	1.3	24	22.5	10	3.7	2	2.33	2.67	2.67
NAIVASHA	B	(CZL052*3/CML543):B>0050>0077>0063>0048-1151 + CKDHL120918	29	3.7	3.1	198	109	0.6	1.2	31	22.9	10	4	2.33	2.33	3.33	3.33
NAIVASHA	B	(CZL052*3/CML543):B>0050>0080>0098>0092-1045 + CKDHL120918	30	4.7	4.6	194	117	0.6	1.2	14	21.9	10	3	2	2.33	2.67	3
NAIVASHA	B	CLYCR034 + CKDHL120918	31	6.6	6.1	207	113	0.5	1.2	3	22.3	10.3	2	2	2.33	3.33	3.33
NAIVASHA	B	CLYCR034 + CKDHL120918	32	5.9	5.6	209	121	0.6	1.1	12	23.9	11	2.3	2	2	3.67	3.67
NAIVASHA	B	(CLYCR034*5/CML543):B>0103>0035>0055>0062-1018 + CKDHL120918	33	8.1	7.2	215	123	0.6	1.2	0	22.9	10.7	1.3	2	2.33	3	3
NAIVASHA	B	(CLYCR034*5/CML543):B>0130>0045>0072>0110-1057 + CKDHL120918	34	7.5	7.2	199	112	0.6	1.3	5	20.6	10.3	1.7	2	2	3	3
NAIVASHA	B	(CLYCR034*5/CML543):B>0150>0224>0243>0293-1186 + CKDHL120918	35	6.1	5.8	223	146	0.6	1.3	8	22.8	10.7	2	2	2.33	3	3
NAIVASHA	B	CML444 + CKDHL120918	36	3.6	3.8	188	105	0.5	1.3	25	22.6	7.7	3	2.33	3	3.67	3.67
NAIVASHA	B	CML444 + CKDHL120918	37	3	3.3	185	100	0.5	1.1	19	21.2	10	3	2.67	3	3.67	4
NAIVASHA	B	CML444 + CKDHL120918	38	3.3	3.5	195	107	0.6	1.1	31	22	9.3	3.3	2.33	3	3.67	3.67
NAIVASHA	B	(CML444*5/CML543):B>0113>0220>0289>0297-1154 + CKDHL120918	39	7.1	6.7	184	112	0.6	1.2	6	23.1	9.7	2.3	2	2	3.33	3.33
NAIVASHA	B	(CML444*5/CML543):B>0079>0195>0274>0264-1073 + CKDHL120918	40	6.4	5.8	196	107	0.5	1.2	0	24	9.3	2	2.33	2.33	3	3.33
NAIVASHA	B	(CML444*5/CML574):B>0022>0117>0093>0082-1096 + CKDHL120918	41	5.8	5.6	198	114	0.6	1.1	9	22.9	10	2.3	2.33	2.67	3.33	3.33
NAIVASHA	B	(CML444*5/CML574):B>0052>0064>0042>0024-1052 + CKDHL120918	42	6	6	196	110	0.6	1	4	23.3	10	2.3	2	2.33	3.33	3.33
NAIVASHA	B	CML507 + CKDHL120918	43	1.3	1.4	173	108	0.6	0.9	59	21.8	7.7	4	2.67	2.67	4.33	4.67
NAIVASHA	B	(CML507*5/CLRCY034):B>0014>0057>0065>0074-1035 + CKDHL120918	44	4.7	4.6	178	100	0.6	1.3	3	22.4	9.3	2.7	2	2	2	2.33
NAIVASHA	B	(CML507*5/CLRCY034):B>0063>0188>0256>0326-1153 + CKDHL120918	45	5.1	5.2	176	109	0.6	1.2	8	22.4	11	2.3	2	2.33	2.33	2.33
NAIVASHA	B	(CML507*5/CLRCY034):B>0014>0051>0041>0024-1183 + CKDHL120918	46	5.2	4.8	178	103	0.6	1.2	0	22.4	10	2	2	2	2	2
NAIVASHA			47
NAIVASHA	A	CLYN261 + CKDHL120312	48	6.2	5.6	188	96	0.5	1.1	42	20.4	9.3	2.7	2.33	2.33	2.33	2.33
NAIVASHA	A	(CML312*5/CLYN261):B>0186>0158>0191>0211-1279 + CKDHL120312	49	9.3	8.3	186	96	0.5	1.3	3	20	9.3	1.7	2	2	2	2
NAIVASHA	A	(CML312*5/CLYN261):B>0214>0108>0141>0141-1155 + CKDHL120312	50	7.8	7.4	176	93	0.5	1.2	6	22	9.7	2.7	2	2	2	2
NAIVASHA	A	(CML312*5/CLYN261):B>0043>0032>0037>0050-1065 + CKDHL120312	51	6.5	5.8	174	94	0.5	1.3	18	20.7	10	2.3	2	2	2.33	2
NAIVASHA	A	CML540 + CKDHL120312	52	2.2	2.3	165	84	0.5	1	26	22.3	9.3	3.3	2.33	3.33	4	4
NAIVASHA	A	CML540 + CKDHL120312	53	1.9	2.4	172	90	0.5	0.9	57	21.7	9.7	4.3	2.33	2.67	4.67	4.67
NAIVASHA	A	(CML540*5/CLYN261):B>0104>0186>0191>0259-1271 + CKDHL120312	54	4.9	4.8	177	88	0.5	1.3	32	21.4	9.3	4	2	2.33	3.67	4
NAIVASHA	A	(CML540*5/CLYN261):B>0095>0167>0171>0242-1195 + CKDHL120312	55	3.9	4	166	95	0.6	1	33	23.3	10.3	3	2	2.67	4	4
NAIVASHA	A	CML544 + CKDHL120312	56	1.6	2	167	92	0.6	1	45	23.8	8.7	4.3	2.33	3	4	4.33
NAIVASHA	A	(CML544*5/CLYN261):B>0099>0194>0228>0344-1245 + CKDHL120312	57	5.9	5.6	192	106	0.6	1.4	27	22.3	9	2.7	2	2	2.67	3.33
NAIVASHA	A	(CML544*5/CLYN261):B>0156>0035>0022>0022-1016 + CKDHL120312	58	3.9	3.9	189	96	0.5	1.2	19	22.7	8.3	3	2.33	2.33	3.67	3.67
NAIVASHA	A	(CML544*5/CLYN261):B>0099>0194>0228>0344-1244 + CKDHL120312	59	4.4	4.5	182	113	0.6	1	19	17.6	10.3	3	2.33	3	3.33	3.67
NAIVASHA	A	DTPF67 + CKDHL120312	60	3.7	4.2	185	85	0.5	1.1	18	20.3	9	3	2	2.33	2.67	2.67
NAIVASHA	A	(DTPF67*5/CLYN261):B>0060>0012>0019>0034-1086 + CKDHL120312	61	6.7	5.9	180	100	0.6	1	39	21.7	9.3	2.7	2.33	2.33	3	3
NAIVASHA	A	(DTPF67*5/CLYN261):B>0060>0006>0003>0001-1012 + CKDHL120312	62	6.5	5.7	188	85	0.5	1.2	33	20.4	9	2.7	2	2	2.33	2.33
NAIVASHA	A	(DTPF67*5/CLYN261):B>0002>0050>0071>0098-1134 + CKDHL120312	63	6.1	5.6	158	82	0.5	1.2	42	19.3	10	2.7	2	2.33	2.67	2.67
NAIVASHA	A	LPSF64 + CKDHL120312	64	4	4.3	199	105	0.5	1.1	13	21.9	9.3	2.3	2	2.67	3.33	3.33
NAIVASHA	A	LPSF64 + CKDHL120312	65	5.6	5.2	192	102	0.5	1.4	19	20.3	10	2.7	2	2.33	3	3
NAIVASHA	A	(LPSF64*5/CLYN261):B>0087>0288>0306>0184-1165 + CKDHL120312	66	6.6	6.4	196	109	0.5	1.2	39	19.7	10.3	2.7	2	2.67	3	3
NAIVASHA	A	DTPYF46 + CKDHL120312	67	4.7	5.1	157	81	0.5	1.3	39	21.2	9.7	3	2	2	3.33	3.33
NAIVASHA	A	DTPYF46 + CKDHL120312	68	5.2	5.3	166	85	0.5	1.3	12	20.6	9.3	3	2.33	2.33	3	3.33
NAIVASHA	A	DTPYF46 + CKDHL120312	69	5.8	5.2	170	86	0.5	1.5	10	19.8	9	3.7	2	2	3.33	3.33
NAIVASHA	A	(LPSF64*5/DTPYF46):B>0016>0007>0008>0001-1009 + CKDHL120312	70	6.3	5.9	195	111	0.6	1.2	33	18.9	10.3	1.7	2	2	2.33	2.33
NAIVASHA	A	(LPSF64*5/DTPYF46):B>0012>0143>0281>0190-1107 + CKDHL120312	71	6	6.1	191	113	0.6	1.2	33	19.7	10.7	2	2	2	2.67	2.67
NAIVASHA	A	CML539 + CKDHL120312	72	5.3	4.7	161	76	0.5	1	12	19.4	9.3	2.3	2.33	2.33	2.33	2.67
NAIVASHA	A	CML539 + CKDHL120312	73	4.7	4.5	159	79	0.5	1.2	17	19.5	9.7	2.7	2	2	2.67	2.67
NAIVASHA	A	CML539 + CKDHL120312	74	5.2	4.9	155	77	0.5	1.1	14	20.5	10.3	2.3	2	2	2.67	2.67
NAIVASHA	A	(CML539*5/DTPYF46):B>0055>0138>0150>0255-1112 + CKDHL120312	75	7.8	7.3	160	80	0.5	1.4	38	18.4	9	2	2	2	2	2
NAIVASHA	A	(CML539*5/DTPYF46):B>0055>0142>0166>0274-1124 + CKDHL120312	76	7.1	6.8	155	80	0.5	1.2	33	19.1	9.3	1.7	2	2	2	2
NAIVASHA	A	(CML539*5/DTPYF46):B>0087>0080>0094>0189-1072 + CKDHL120312	77	7	6.5	157	77	0.5	1.2	11	19.5	10.3	2.3	2	2	2.33	2.33
NAIVASHA		DUMA43	78	0.3	0.4	145	71	0.5	0.4	100	21.7	9.3	3.7	4.33	6	7.33	8
NAIVASHA		DK8031	79	0.5	0.6	147	85	0.6	0.4	72	21.7	8.3	4.3	4.33	5.33	6.33	7.33
NAIVASHA		PH3253	80	0	0	0	0	0	0	0	0	3.3	0	4.33	6.33	8	8
NAIVASHA		WE5135	81	5.2	5.2	165	93	0.6	1.2	17	19.8	9.7	3.7	2.33	2.33	3	3
NAIVASHA		CKMLN150073	82	0.6	1	142	92	0.6	0.5	57	24.8	8	4	4.33	5.67	6.33	7
		Mean		4.78272	4.59383	182.21	100.259	0.54321	1.1037	23.6049	21.4358	9.59136	2.83704	2.25852	2.64568	3.39481	3.5184
		LSD (0.05)		2.2	1.89	26	20.3	0.09	0.4	37.3	11.6	2.1	1	0.6	0.77	0.84	0.84
		MSe		1.87	1.39	260.3	157.9	0	0.06	537.7	52.2	1.8	0.4	0.14	0.23	0.27	0.27
		CV		31.41	27.78	8.8	12.7	10.64	21.71	82.9	33.2	14.1	20.5	16.36	18.16	15.46	14.95
		Heritability		0.839245	0.845266	0.65668	0.663137	0.366444	0.683301	0.489984	0.132854	0.373907	0.818182	0.696769	0.795132	0.868611	0.894326
		p		***	***	***	***	***	***	***	+	***	***	***	***	***	***
		Location		1	1	1	1	1	1	1	0	1	1	1	1	1	1
		Replications		3	3	3	3	3	3	3	3	3	3	3	3	3	3

## Sheet: Table S4_MABC_MLN_Babati3
Supplementary Table S4. Analyses of variance and Mean Performance of Testcross Hybrids from Recurrent Parent, Donor Parent, and Introgression Lines Evaluated for MLN Disease Severity, Grain Yield, and Agronomic Traits under natural MLN disease hotspot location in Babati, Tanzania
		Grain Yield	Anthesis date	Silking date	Anthe-silking interval	Plant	Ear	Ear	Lodging	Ears/	Grain	Num	MLN disease severity
		FW	AD	SD	ASI	Height	Height	Position	Root	Plant	Moisture	Plants	MLN1	MLN2	MLN3
Entry	Pedigree (Line + tester)	t/ha	d	d	d	cm	cm	0-1	%	#	%	#	1-9	1-9	1-9
42	CML543 + CKDHL120918	4	75	79	3	138	74	0.5	2	0.8	13.8	19.3	1.04494	1.94395	2.06693
78	CML543 + CKDHL120918	3.2	58	61	3	134	75	0.6	19	0.8	11.4	15	1.49947	3.08797	3.20396
109	CML543 + CKDHL120918	3.8	73	76	3	149	76	0.5	8	1	13.7	14	1.04494	1.94395	2.06693
110	CML543 + CKDHL120918	4.1	73	76	3	134	76	0.6	10	0.8	11.9	17	1.04494	2.63036	2.74914
8	CML202 + CKDHL120918	3.4	73	76	3	131	68	0.5	0	0.9	12.2	19.7	1.04494	2.85916	2.97655
9	CML202 + CKDHL120918	2.5	75	77	2	137	72	0.5	0	0.7	11.9	20.3	1.04494	2.85916	3.65877
3	(CML202*5/CML543):B>0113>0302>0261>0292-1113 + CKDHL120918	4.7	72	75	3	132	67	0.5	5	0.9	12.5	20	1.04494	2.17275	2.29433
4	(CML202*5/CML543):B>0113>0302>0261>0292-1127 + CKDHL120918	4.6	73	76	3	131	68	0.5	1	0.9	12.2	19.7	1.04494	2.17275	2.29433
5	(CML202*5/CML543):B>0113>0302>0261>0292-1131 + CKDHL120918	5.1	73	76	3	134	66	0.5	10	1	12.3	18.7	1.04494	2.17275	2.29433
72	CML489 + CKDHL120918	2.6	68	71	3	132	70	0.6	4	0.8	11.4	19.3	1.04494	2.85916	3.20396
73	CML489 + CKDHL120918	1.5	71	74	3	137	70	0.5	11	0.6	11.1	15.3	1.04494	2.85916	3.65877
67	(CML489*5/CML543):B>0187>0235>0232>0274-1131 + CKDHL120918	3.8	68	71	3	134	65	0.5	19	1	11.5	16.7	1.04494	1.94395	2.06693
68	(CML489*5/CML543):B>0187>0235>0232>0274-1142 + CKDHL120918	4.2	71	74	2	141	77	0.5	4	0.8	12.3	22	1.04494	1.94395	2.06693
148	CML546 + CKDHL120918	2	69	72	3	134	68	0.5	5	0.7	11	16	1.04494	3.31677	3.65877
149	CML546 + CKDHL120918	2.9	64	67	3	137	73	0.5	9	0.8	11.4	18	1.49947	3.77438	3.88618
143	(CML546*5/CML543):B>0004>0233>0208>0228-1151 + CKDHL120918	4.8	61	64	3	134	69	0.5	6	1	11.4	17.7	1.2722	2.85916	3.43136
145	(CML546*5/CML543):B>0127>0034>0040>0060-1219 + CKDHL120918	5.5	59	62	3	142	70	0.5	4	0.9	11.5	18.3	1.04494	2.17275	2.52174
49	CML574 + CKDHL120918	4	76	79	3	137	77	0.6	6	0.9	12.6	17.7	1.04494	1.48634	1.61211
119	CML574 + CKDHL120918	5.1	72	75	3	144	77	0.6	2	1	14.2	18	1.2722	2.63036	2.74914
205	CML574 + CKDHL120918	4.7	65	68	3	143	73	0.5	6	0.9	13.9	16.7	1.04494	2.17275	2.97655
206	CML574 + CKDHL120918	6.1	68	71	3	141	81	0.6	9	1	13.5	18.3	1.04494	1.48634	2.52174
199	(CML574*5/CML543):B>0019>0074>0103>0160-1034 + CKDHL120918	5.3	70	73	3	135	76	0.6	7	0.9	12.5	19.3	1.04494	2.40156	2.97655
200	(CML574*5/CML543):B>0154>0157>0168>0327-1086 + CKDHL120918	5.4	71	74	3	156	85	0.5	0	1	14.1	20	1.04494	2.40156	2.52174
202	(CML574*5/CML543):B>0177>0214>0198>0353-1126 + CKDHL120918	5.8	68	71	3	151	81	0.5	5	1	13.7	20	1.04494	1.94395	2.97655
256	CZL052 + CKDHL120918	1.9	69	72	3	138	73	0.5	5	0.9	11.4	12.3	1.04494	2.63036	3.43136
257	CZL052 + CKDHL120918	4	64	67	3	144	75	0.5	4	0.9	11.6	19.7	1.04494	2.63036	2.74914
254	(CZL052*3/CML543):B>0050>0077>0063>0048-1151 + CKDHL120918	4.7	65	68	3	142	80	0.6	4	0.8	12.2	18.7	1.04494	1.94395	2.06693
249	(CZL052*3/CML543):B>0050>0080>0098>0092-1044 + CKDHL120918	4.4	67	70	3	137	81	0.6	10	0.9	11.5	17.7	1.04494	2.17275	2.52174
250	(CZL052*3/CML543):B>0050>0080>0098>0092-1045 + CKDHL120918	4	65	68	3	140	73	0.5	2	1	12.4	16	1.04494	2.40156	2.52174
197	CLYCR034 + CKDHL120918	4.7	75	78	3	146	88	0.6	6	0.9	13.9	18.3	1.04494	1.94395	2.97655
198	CLYCR034 + CKDHL120918	4	73	76	3	140	75	0.6	3	0.7	13.1	19.7	1.04494	1.94395	2.74914
190	(CLYCR034*5/CML543):B>0103>0035>0055>0062-1018 + CKDHL120918	5.1	74	77	3	146	82	0.5	4	0.8	13.9	19	1.04494	2.40156	2.74914
191	(CLYCR034*5/CML543):B>0130>0045>0072>0110-1057 + CKDHL120918	3.7	74	78	4	145	84	0.6	11	0.7	12.4	17.3	1.04494	2.17275	2.97655
195	(CLYCR034*5/CML543):B>0150>0224>0243>0293-1186 + CKDHL120918	5.3	74	77	3	149	80	0.5	5	1	13	16.7	1.04494	1.48634	2.06693
41	CML444 + CKDHL120918	3.8	73	76	3	131	79	0.6	7	1	12.3	16	1.04494	2.85916	3.43136
48	CML444 + CKDHL120918	3.6	71	74	3	137	76	0.5	7	0.8	12.2	18.3	1.04494	2.85916	3.65877
54	CML444 + CKDHL120918	3.6	66	69	3	111	62	0.6	4	0.9	12.5	18.3	1.2722	3.54558	4.11358
35	(CML444*5/CML543):B>0079>0195>0274>0264-1073 + CKDHL120918	5.8	73	76	3	158	84	0.5	0	0.9	14.2	20.7	1.04494	1.48634	2.06693
37	(CML444*5/CML543):B>0113>0220>0289>0297-1154 + CKDHL120918	5	71	74	3	156	89	0.6	2	0.9	12.9	17.7	1.04494	1.71514	2.29433
47	(CML444*5/CML574):B>0022>0117>0093>0082-1096 + CKDHL120918	4.6	64	67	3	129	75	0.6	2	0.9	12.7	17.7	1.04494	2.40156	2.74914
46	(CML444*5/CML574):B>0052>0064>0042>0024-1052 + CKDHL120918	4.3	70	73	3	141	77	0.6	0	0.9	13.4	16.7	1.04494	1.71514	2.52174
77	CML507 + CKDHL120918	2.6	56	59	2	125	71	0.5	13	0.7	10.6	20	1.49947	3.54558	4.34099
79	(CML507*5/CLRCY034):B>0014>0057>0065>0074-1035 + CKDHL120918	3.6	60	63	3	138	78	0.6	28	0.8	11.3	15.3	1.04494	2.17275	2.52174
209	CLYN261 + CKDHL120312	5.7	63	66	3	156	77	0.5	8	0.7	11.4	21	1.04494	1.48634	1.61211
11	(CML312*5/CLYN261):B>0043>0032>0037>0050-1065 + CKDHL120312	6.4	59	62	3	147	67	0.4	13	1	10.6	17.7	1.04494	1.71514	1.83952
15	(CML312*5/CLYN261):B>0186>0158>0191>0211-1279 + CKDHL120312	6.4	57	60	3	159	76	0.5	7	1	10.9	17.7	1.04494	1.94395	2.06693
12	(CML312*5/CLYN261):B>0214>0108>0141>0141-1155 + CKDHL120312	6.4	62	65	3	143	68	0.5	8	1	11.4	18.3	1.04494	1.94395	2.29433
102	CML540 + CKDHL120312	3	60	63	3	137	56	0.4	6	0.8	10.6	19	1.04494	3.08797	3.43136
103	CML540 + CKDHL120312	3.9	62	65	3	144	55	0.4	0	0.9	10.8	18.3	1.49947	3.31677	3.43136
98	(CML540*5/CLYN261):B>0095>0167>0171>0242-1195 + CKDHL120312	3.5	63	66	3	155	64	0.4	8	0.8	10.6	16	1.2722	2.85916	2.97655
100	(CML540*5/CLYN261):B>0104>0186>0191>0259-1271 + CKDHL120312	3.5	61	64	3	142	70	0.5	19	1	10.4	17.3	1.2722	3.08797	3.65877
129	CML544 + CKDHL120312	2.1	71	74	3	138	69	0.5	17	0.6	10.8	17.7	1.49947	3.77438	3.88618
127	(CML544*5/CLYN261):B>0099>0194>0228>0344-1244 + CKDHL120312	3.4	71	74	2	144	67	0.5	17	0.7	11	18.7	1.49947	3.31677	3.65877
128	(CML544*5/CLYN261):B>0099>0194>0228>0344-1245 + CKDHL120312	4.2	67	70	3	129	62	0.5	7	0.9	10.7	18	1.2722	2.85916	2.97655
121	(CML544*5/CLYN261):B>0156>0035>0022>0022-1016 + CKDHL120312	4	71	74	3	133	61	0.5	15	0.9	10.7	18	1.04494	3.31677	4.11358
183	LPSF64 + CKDHL120312	5.6	64	67	3	149	85	0.6	7	0.9	11.7	17	1.04494	2.63036	2.74914
188	LPSF64 + CKDHL120312	4.9	70	73	3	153	90	0.6	4	1	11.6	17	1.04494	2.85916	3.20396
181	(LPSF64*5/CLYN261):B>0087>0288>0306>0184-1165 + CKDHL120312	6.4	62	64	2	155	89	0.6	10	0.9	12.4	20.3	1.04494	2.17275	2.29433
62	DTPYF46 + CKDHL120312	3.7	61	64	3	141	63	0.4	18	1.1	10.7	16.3	1.04494	2.17275	2.74914
214	DTPYF46 + CKDHL120312	5.4	60	63	3	141	64	0.5	7	0.9	10.9	20	1.04494	1.48634	2.06693
215	DTPYF46 + CKDHL120312	5.1	61	64	3	139	64	0.5	9	0.9	11	18.7	1.04494	1.94395	2.52174
187	(LPSF64*5/DTPYF46):B>0012>0143>0281>0190-1107 + CKDHL120312	6.6	65	68	3	149	82	0.5	2	1	11.9	19	1.04494	1.94395	2.29433
184	(LPSF64*5/DTPYF46):B>0016>0007>0008>0001-1009 + CKDHL120312	5.9	64	67	2	136	76	0.6	4	0.8	10.9	19.3	1.04494	1.71514	2.06693
86	CML539 + CKDHL120312	4.8	61	64	3	153	65	0.4	8	0.9	10.9	16.7	1.04494	2.63036	2.97655
94	CML539 + CKDHL120312	4.6	61	64	3	149	69	0.5	5	0.9	10.9	18.7	1.2722	3.08797	3.20396
95	CML539 + CKDHL120312	5.6	59	62	3	145	71	0.5	13	0.9	11.1	20.3	1.2722	2.85916	2.74914
90	(CML539*5/DTPYF46):B>0055>0138>0150>0255-1112 + CKDHL120312	6.3	56	59	3	159	73	0.5	13	1	10.7	20.3	1.04494	1.71514	1.83952
91	(CML539*5/DTPYF46):B>0055>0142>0166>0274-1124 + CKDHL120312	6.1	58	61	3	148	58	0.4	15	0.9	11.4	18.3	1.04494	1.48634	1.61211
88	(CML539*5/DTPYF46):B>0087>0080>0094>0189-1072 + CKDHL120312	4.7	59	62	3	152	73	0.5	4	0.8	11.3	19	1.2722	2.17275	2.29433
258	DUMA43	0.3	75	79	4	113	58	0.5	2	0.4	11.1	14	2.40855	5.60481	6.84246
259	DK8031	0.5	73	77	4	130	80	0.6	17	0.4	9.8	15.7	2.86309	4.9184	5.93283
260	PH3253	0.1	73	76	3	105	66	0.6	12	0.1	7.3	12.3	2.40855	6.06242	7.06986
261	WE5135	4	57	60	3	135	72	0.5	14	1	10.8	14.7	1.2722	2.40156	2.97655
262	CKMLN150073	2.1	73	77	3	130	74	0.6	23	0.6	10.9	21	2.63582	5.1472	5.70543
	Mean	4.22973	66.8784	69.9189	2.95946	140.27	72.973	0.524324	7.85135	0.854054	11.7932	17.9649	1.2	2.57	2.97
	LSD (0.05)	1.76	4.5	4.3	2.4	24.1	17.3	0.11	14.5	0.33	1.5	4.5	0.152204	0.47921	0.563601
	MSe	1.19	4.8	4.4	1.4	225.5	116	0	81.4	0.04	0.9	7.9	0.0264117	0.260061	0.361934
	CV	26.09	3.3	3.1	43.2	10.7	14.9	13.4	108.7	22.96	8.1	15.6	15.1798	28.723	30.6458
	Heritability	0.76	1	1	0.5	0.5	0.3	0.44	0.3	0.25	0.7	0.3	0.681808	0.686412	0.682219
	p	0	0	0	0.163	0	0	0	0	0.003	0	0
	p	***	***	***	ns	***	***	***	***	**	***	***
	Replications	3	3	3	3	3	3	3	3	3	3	3	3	3	3

## Sheet: Table S5_MLN_Babati_4
Supplementary Table S4. Analyses of variance and Mean Performance of Testcross Hybrids from Recurrent Parent, Donor Parent, and Introgression Lines Evaluated for MLN Disease Severity, Grain Yield, and Agronomic Traits under natural MLN disease hotspot location in Babati, Tanzania
	Grain Yield	Plant	Ear	Ear	Lodging	Ears/	Ear	Num
	FW	Height	Height	Position	Root	Plant	Rot	Plants	MLN Disease severity
Pedigree (Line + tester)	t/ha	cm	cm	0-1	%	#	%	#	1-5
CML543 + CKDHL120918	1.5	121	67	0.6	9	0.7	24	17	3
CML543 + CKDHL120918	1.7	139	71	0.5	43	0.7	30	16	3
CML543 + CKDHL120918	1.5	139	75	0.6	48	0.8	29	17	2
CML543 + CKDHL120918	2.1	133	67	0.5	38	0.7	39	20	3
CML202 + CKDHL120918	1.3	132	60	0.4	17	0.7	45	22	3
CML202 + CKDHL120918	1.2	141	73	0.5	8	0.5	55	21	3
(CML202*5/CML543):B>0113>0302>0261>0292-1113 + CKDHL120918	1.6	142	71	0.5	15	0.5	46	21	3
(CML202*5/CML543):B>0113>0302>0261>0292-1127 + CKDHL120918	1.3	193	71	0.4	17	0.5	31	19	3
(CML202*5/CML543):B>0113>0302>0261>0292-1131 + CKDHL120918	1.2	134	67	0.5	15	0.5	30	21	3
CML489 + CKDHL120918	1.2	139	70	0.5	28	0.6	54	16	3
CML489 + CKDHL120918	1.1	142	71	0.5	53	0.7	18	16	3
(CML489*5/CML543):B>0187>0235>0232>0274-1131 + CKDHL120918	0.7	134	62	0.5	17	0.4	18	22	3
(CML489*5/CML543):B>0187>0235>0232>0274-1142 + CKDHL120918	0.5	127	73	0.6	16	0.3	46	18	3
CML546 + CKDHL120918	1	128	73	0.6	13	0.8	21	18	3
CML546 + CKDHL120918	1.4	134	77	0.6	31	0.7	47	17	3
(CML546*5/CML543):B>0127>0034>0040>0060-1219 + CKDHL120918	2.5	153	72	0.5	7	0.8	8	18	3
(CML546*5/CML543):B>0004>0233>0208>0228-1151 + CKDHL120918	1.5	147	81	0.5	31	0.7	38	18	3
CML574 + CKDHL120918	2.5	140	74	0.5	27	0.9	4	16	3
CML574 + CKDHL120918	2	136	75	0.6	14	0.6	16	22	3
CML574 + CKDHL120918	2.8	127	75	0.6	29	0.8	7	19	3
CML574 + CKDHL120918	1.8	149	69	0.5	40	0.7	40	22	3
(CML574*5/CML543):B>0177>0214>0198>0353-1126 + CKDHL120918	2.7	127	78	0.6	8	0.9	6	21	3
(CML574*5/CML543):B>0154>0157>0168>0327-1086 + CKDHL120918	2.6	136	70	0.5	24	0.7	20	19	3
(CML574*5/CML543):B>0019>0074>0103>0160-1034 + CKDHL120918	2.5	118	72	0.6	11	0.7	16	20	3
CZL052 + CKDHL120918	1	128	69	0.6	14	0.5	35	20	2
CZL052 + CKDHL120918	1	145	57	0.4	23	0.5	27	22	3
(CZL052*3/CML543):B>0050>0080>0098>0092-1044 + CKDHL120918	1.2	113	64	0.6	18	0.6	30	21	3
(CZL052*3/CML543):B>0050>0077>0063>0048-1151 + CKDHL120918	2	129	70	0.5	17	0.8	8	19	3
(CZL052*3/CML543):B>0050>0080>0098>0092-1045 + CKDHL120918	1.8	124	74	0.6	26	0.7	6	21	1
CLYCR034 + CKDHL120918	1	139	74	0.5	13	0.5	22	17	3
CLYCR034 + CKDHL120918	2.6	133	73	0.5	29	0.7	28	20	3
(CLYCR034*5/CML543):B>0103>0035>0055>0062-1018 + CKDHL120918	1	137	70	0.5	7	0.6	11	21	3
(CLYCR034*5/CML543):B>0130>0045>0072>0110-1057 + CKDHL120918	0.8	156	74	0.5	18	0.4	21	21	3
(CLYCR034*5/CML543):B>0150>0224>0243>0293-1186 + CKDHL120918	1	131	72	0.6	7	0.4	35	22	3
CML444 + CKDHL120918	1.5	132	69	0.5	17	0.8	19	19	3
CML444 + CKDHL120918	1.9	142	75	0.6	12	0.7	35	20	3
CML444 + CKDHL120918	1.2	138	74	0.5	22	0.6	47	19	3
(CML444*5/CML543):B>0113>0220>0289>0297-1154 + CKDHL120918	2.3	146	79	0.5	9	0.8	12	16	1
(CML444*5/CML543):B>0079>0195>0274>0264-1073 + CKDHL120918	2.7	138	74	0.6	21	0.7	9	18	1
(CML444*5/CML574):B>0022>0117>0093>0082-1096 + CKDHL120918	1.8	145	83	0.6	5	0.8	4	19	3
(CML444*5/CML574):B>0052>0064>0042>0024-1052 + CKDHL120918	2.1	135	72	0.6	25	0.7	8	18	3
CML507 + CKDHL120918	2.2	136	60	0.4	16	0.8	76	18	3
(CML507*5/CLRCY034):B>0014>0057>0065>0074-1035 + CKDHL120918	2.7	135	73	0.6	38	0.9	32	20	1
CLYN261 + CKDHL120312	3.5	163	76	0.5	31	0.7	60	21	3
(CML312*5/CLYN261):B>0186>0158>0191>0211-1279 + CKDHL120312	3.4	148	77	0.5	33	0.7	10	21	3
(CML312*5/CLYN261):B>0214>0108>0141>0141-1155 + CKDHL120312	2.5	158	83	0.5	31	0.7	19	20	3
(CML312*5/CLYN261):B>0043>0032>0037>0050-1065 + CKDHL120312	2.7	148	74	0.5	42	0.6	24	18	3
CML540 + CKDHL120312	1.6	128	69	0.5	5	0.7	67	21	3
CML540 + CKDHL120312	1.9	136	73	0.5	17	0.7	30	20	3
(CML540*5/CLYN261):B>0104>0186>0191>0259-1271 + CKDHL120312	2.9	151	71	0.5	29	1	30	18	3
(CML540*5/CLYN261):B>0095>0167>0171>0242-1195 + CKDHL120312	3.8	197	76	0.5	29	0.8	38	20	3
CML544 + CKDHL120312	1.4	156	82	0.5	23	0.5	47	20	3
(CML544*5/CLYN261):B>0099>0194>0228>0344-1245 + CKDHL120312	2.3	160	79	0.5	38	0.8	13	21	3
(CML544*5/CLYN261):B>0156>0035>0022>0022-1016 + CKDHL120312	1.7	152	82	0.5	13	0.5	30	21	1
(CML544*5/CLYN261):B>0099>0194>0228>0344-1244 + CKDHL120312	0.4	149	79	0.5	39	0.6	57	20	3
LPSF64 + CKDHL120312	2.6	217	71	0.3	24	0.8	8	21	2
LPSF64 + CKDHL120312	2.5	131	69	0.5	9	0.8	21	19	3
(LPSF64*5/CLYN261):B>0087>0288>0306>0184-1165 + CKDHL120312	2.6	153	73	0.5	41	0.8	17	18	1
DTPYF46 + CKDHL120312	1.8	141	73	0.5	38	0.6	11	19	3
DTPYF46 + CKDHL120312	3	155	78	0.5	38	0.8	13	19	2
DTPYF46 + CKDHL120312	2.2	146	76	0.5	43	0.6	13	21	2
(LPSF64*5/DTPYF46):B>0016>0007>0008>0001-1009 + CKDHL120312	3.8	167	70	0.4	19	0.8	13	20	3
(LPSF64*5/DTPYF46):B>0012>0143>0281>0190-1107 + CKDHL120312	3.9	160	75	0.5	31	1	37	19	3
CML539 + CKDHL120312	2.1	128	62	0.5	38	1.1	30	17	3
CML539 + CKDHL120312	2.7	165	74	0.4	9	0.8	17	20	3
CML539 + CKDHL120312	2.3	152	77	0.5	23	0.8	43	17	3
(CML539*5/DTPYF46):B>0055>0138>0150>0255-1112 + CKDHL120312	3.4	130	63	0.5	18	1.1	25	19	2
(CML539*5/DTPYF46):B>0055>0142>0166>0274-1124 + CKDHL120312	3.7	140	69	0.5	28	1	23	22	2
(CML539*5/DTPYF46):B>0087>0080>0094>0189-1072 + CKDHL120312	2.3	122	65	0.5	23	0.9	25	19	2
DUMA43	0.5	136	76	0.6	7	0.3	100	21	5
DK8031	0.3	111	69	0.6	28	0.3	67	16	5
PH3253	0.3	127	69	0.6	43	0.1	48	16	5
WE5135	3.7	130	68	0.5	17	0.8	18	20	3
CKMLN150073	1	88	69	2.3	9	0.7	65	19	3
Mean	1.95676	141.054	72.1216	0.541892	23.1351	0.686486	29.3514	19.3243	2.81081
LSD (0.05)	2.04	37.6	18.9	0.32	35.1	0.38	39.1	4	0
MSe	1.61	547.2	138.4	0.04	475.3	0.05	588.2	6	0
CV	62.72	16.8	16.2	37.5	92.4	31.96	84.9	13	36
Heritability	0.2	0.1	0	0	0.1	0.4	0.3	0	0.5
p	0.01	0.141	0.533	0.353	0.141	0	0.001	0
p	*	ns	ns	ns	ns	***	**	ns
Replications	3	3	3	3	3	3	3	3

## Sheet: Table S6_Opt_Kiboko
Supplementary Table S6. Analysis of Variance and Mean Performance of Testcross Hybrids from Recurrent Parent, Donor Parent, and Introgression Lines for Grain Yield and Agronomic Traits under Optimum Conditions in Kiboko, Kenya
	Grain Yield		Anth	Days to	ASI	Plant	Ear	Ear	Lodging		Ears/	Husk	Ear	Grain	Num	Ear	Plant
	GW	FW	Date	Silk		Height	Height	Position	Root	Stem	Plant	Cover	Rot	Moist	Plants	Aspect	Aspect
Pedigree (Line + tester)	t/ha	t/ha	d	d	d	cm	cm	0-1	%	%	#	%	%	%	#	1-5	1-5
CML543 + CKDHL120918	3.4	3.6	66	67	1	184	96	0.5	0	12	0.8	7	0	19.7	20.7	3	2.8
CML543 + CKDHL120918	3.6	3.7	57	56	0	183	90	0.5	0	36	1	39	0	17.3	19	3	3.3
CML543 + CKDHL120918	3.6	3.3	68	69	1	188	104	0.5	0	16	0.9	21	0	21	19.3	2.7	2.8
CML543 + CKDHL120918	3.1	3.7	68	68	0	196	99	0.5	2	14	0.9	5	0	20.8	21	2.7	2.8
CML202 + CKDHL120918	2.7	2.8	65	68	3	166	81	0.5	0	2	0.9	25	0	18.4	20.3	3.2	2.8
CML202 + CKDHL120918	2.8	2.8	68	70	2	172	81	0.5	0	0	0.9	32	0	18.3	20.7	3.2	2.8
(CML202*5/CML543):B>0113>0302>0261>0292-1113 + CKDHL120918	3	2.9	66	67	1	173	82	0.5	0	8	0.9	21	0	18.4	20.7	3.2	3.2
(CML202*5/CML543):B>0113>0302>0261>0292-1127 + CKDHL120918	2.9	3	65	68	2	185	89	0.5	0	2	0.8	21	0	18.7	20.7	3	2.8
(CML202*5/CML543):B>0113>0302>0261>0292-1131 + CKDHL120918	2.6	2.7	66	69	3	179	87	0.5	0	6	0.8	21	0	18.3	21	3.3	2.8
CML489 + CKDHL120918	3.9	3.7	66	67	1	179	81	0.5	0	7	1.1	27	0	18.9	20	2.7	2.5
CML489 + CKDHL120918	4.1	3.9	64	65	1	184	87	0.5	0	5	1	16	2	19.9	20	2.2	2.5
(CML489*5/CML543):B>0187>0235>0232>0274-1131 + CKDHL120918	4	3.8	64	65	2	185	95	0.5	5	20	1.1	29	0	18.9	19.7	2.8	2.8
(CML489*5/CML543):B>0187>0235>0232>0274-1142 + CKDHL120918	4	3.7	64	65	2	190	91	0.5	0	18	1	25	0	20	19.7	2.7	2.8
CML546 + CKDHL120918	3.6	3.5	60	60	0	190	86	0.5	0	2	0.9	32	0	19.1	20	3	2.7
CML546 + CKDHL120918	3.6	3.4	60	61	1	183	82	0.4	0	2	1	24	0	18.5	21	3.2	2.3
(CML546*5/CML543):B>0127>0034>0040>0060-1219 + CKDHL120918	4	3.9	61	61	0	194	89	0.5	0	0	1	22	0	18.9	21	2.7	2.2
(CML546*5/CML543):B>0004>0233>0208>0228-1151 + CKDHL120918	3.5	3.5	61	62	1	190	88	0.5	0	0	0.9	32	0	19.1	20.7	3	2.3
CML574 + CKDHL120918	3.7	3.7	65	68	3	189	96	0.5	0	12	0.9	14	0	20.2	20.3	2.8	2.7
CML574 + CKDHL120918	3.9	3.8	68	69	1	192	94	0.5	2	2	0.9	10	0	20.4	20	2.5	2.2
CML574 + CKDHL120918	2.9	3	67	70	2	171	83	0.5	2	10	0.9	13	0	19.5	20.3	3.2	3
CML574 + CKDHL120918	4	3.8	67	68	1	184	87	0.5	0	7	1	3	0	18.6	19.3	2.7	2.5
(CML574*5/CML543):B>0154>0157>0168>0327-1086 + CKDHL120918	3.5	3.6	67	68	1	184	93	0.5	0	2	0.9	8	0	21.1	21	2.8	2.7
CZL052 + CKDHL120918	3.8	3.6	63	64	1	182	95	0.5	0	7	0.9	7	0	18.6	19.7	2.7	2.5
CZL052 + CKDHL120918	4	3.9	64	65	1	190	102	0.5	3	0	0.9	10	2	19	21	2.5	2.7
(CZL052*3/CML543):B>0050>0080>0098>0092-1044 + CKDHL120918	4.3	4.1	64	64	0	185	103	0.6	0	5	1	6	0	18.6	20.7	2.5	2.3
(CZL052*3/CML543):B>0050>0077>0063>0048-1151 + CKDHL120918	4	3.7	63	63	0	174	95	0.5	5	2	1	10	0	18.2	20.7	2.7	2.3
CLYCR034 + CKDHL120918	3.4	3.3	67	70	3	179	91	0.5	3	3	0.9	11	0	20.9	20.7	2.7	2.8
CLYCR034 + CKDHL120918	3.6	3.7	67	69	2	190	103	0.5	0	5	0.9	8	0	20.3	20.3	2.7	2.7
(CLYCR034*5/CML543):B>0103>0035>0055>0062-1018 + CKDHL120918	3.6	3.6	69	71	2	190	98	0.5	0	5	0.9	5	0	21.5	20.3	2.7	2.2
(CLYCR034*5/CML543):B>0130>0045>0072>0110-1057 + CKDHL120918	4.1	3.9	67	69	1	194	99	0.5	0	3	0.9	7	0	21.2	21	2.5	2.2
(CLYCR034*5/CML543):B>0150>0224>0243>0293-1186 + CKDHL120918	3.8	3.9	68	70	2	197	108	0.5	2	0	0.9	5	0	21.8	20.7	2.3	2.2
CML444 + CKDHL120918	3.4	3.5	65	65	0	186	102	0.6	2	5	0.9	46	0	18.3	21	3.3	2.2
CML444 + CKDHL120918	3.1	2.9	65	64	-1	176	98	0.6	0	5	0.9	34	2	18.1	20.7	3.3	2.7
CML444 + CKDHL120918	3.8	3.9	64	64	0	193	107	0.5	0	5	0.9	23	0	19.6	20.7	2.8	2.3
(CML444*5/CML543):B>0113>0220>0289>0297-1154 + CKDHL120918	3.4	3.4	66	66	1	196	106	0.5	0	13	1	31	0	19.2	20.3	3.3	2.5
(CML444*5/CML574):B>0022>0117>0093>0082-1096 + CKDHL120918	2.9	3.2	66	67	1	191	109	0.6	0	18	0.9	24	0	17.1	20.7	3.7	3.2
(CML444*5/CML574):B>0052>0064>0042>0024-1052 + CKDHL120918	3.4	3.4	66	65	0	190	101	0.5	0	0	0.9	25	0	19.4	20.3	3.2	2.3
CML507 + CKDHL120918	3.6	3.7	57	57	0	189	93	0.5	2	35	0.9	49	0	17	20.3	2.8	3.3
(CML507*5/CLRCY034):B>0014>0057>0065>0074-1035 + CKDHL120918	4.1	4.3	57	57	1	189	96	0.5	0	39	1	47	2	17.3	20.3	2.8	3.3
CLYN261 + CKDHL120312	4.4	4.4	60	60	0	190	91	0.5	0	70	1	49	0	17	18	3.2	2.7
(CML312*5/CLYN261):B>0186>0158>0191>0211-1279 + CKDHL120312	3.9	4	59	59	0	208	93	0.4	0	31	1	38	4	16.3	20.3	3	2.8
(CML312*5/CLYN261):B>0214>0108>0141>0141-1155 + CKDHL120312	3.9	3.9	58	59	1	202	94	0.5	3	22	1	47	0	16.6	20.3	3	2.7
(CML312*5/CLYN261):B>0043>0032>0037>0050-1065 + CKDHL120312	3.7	3.9	59	60	1	197	86	0.4	2	28	1	16	0	16.5	19	3.2	2.7
CML540 + CKDHL120312	3.3	3.2	55	57	2	180	58	0.3	2	26	0.9	29	0	16.4	21	3.3	3.3
CML540 + CKDHL120312	3.5	3.4	64	66	3	187	58	0.3	2	18	0.8	36	0	15.5	20.3	3.5	3.3
(CML540*5/CLYN261):B>0104>0186>0191>0259-1271 + CKDHL120312	3.4	3.4	55	56	1	187	66	0.4	0	33	1	44	0	16	20	3.2	3
(CML540*5/CLYN261):B>0095>0167>0171>0242-1195 + CKDHL120312	3.6	3.6	56	58	1	193	72	0.4	0	10	0.9	42	0	15.5	20	3.3	2.8
CML544 + CKDHL120312	3.8	3.5	59	59	0	202	101	0.5	0	63	1	42	0	17.6	20	3.2	3.5
DTPYF46 + CKDHL120312	3.1	3.1	54	55	1	186	76	0.4	0	46	0.9	70	0	16.5	19.7	3.7	3.7
DTPYF46 + CKDHL120312	3.4	3.4	53	52	-1	183	70	0.4	2	30	1	65	0	16.2	20	3.2	3.2
DTPYF46 + CKDHL120312	3.4	3.5	55	54	-1	184	81	0.4	0	18	1.1	58	0	15.9	19.3	3.5	3.2
CML539 + CKDHL120312	3.9	3.9	55	54	-1	183	74	0.4	0	27	0.9	30	0	16.5	20.3	3	3
CML539 + CKDHL120312	3.7	4.6	53	54	1	195	84	0.4	0	24	1.1	20	0	17.5	18.3	2.3	2.5
CML539 + CKDHL120312	4.3	4.3	56	56	0	196	81	0.4	0	32	0.9	27	0	17.6	20.3	2.7	2.5
(CML539*5/DTPYF46):B>0055>0138>0150>0255-1112 + CKDHL120312	3.9	3.9	54	53	-1	184	76	0.4	2	29	0.9	35	0	16.5	20.7	3.2	3.2
(CML539*5/DTPYF46):B>0055>0142>0166>0274-1124 + CKDHL120312	4.3	4.3	53	54	1	195	76	0.4	0	16	1	31	0	16.9	19.3	2.8	2.5
(CML539*5/DTPYF46):B>0087>0080>0094>0189-1072 + CKDHL120312	4	4	55	54	-1	183	73	0.4	3	33	1	25	0	17.2	19.7	2.8	2.8
DUMA43	4	3.7	58	61	3	199	83	0.4	0	8	0.9	27	0	14.8	19.7	3	2.8
DK8031	3.1	3.1	61	65	4	222	106	0.5	0	24	0.9	27	6	14.9	19.3	3.3	3.3
PH3253	3.9	3.9	62	67	5	216	114	0.5	0	27	0.8	15	2	17	20	3	3
WE5135	3.6	3.7	58	60	2	194	99	0.5	0	88	1	26	0	17.4	19	3.2	3.7
CKMLN150073	4.8	4.7	63	65	2	186	101	0.5	3	43	0.9	22	0	18.7	19.7	2.7	2.8
Mean	3.63871	3.63226	61.871	62.8871	1.06452	188.452	90	0.475806	0.758065	17.4032	0.937097	26.0645	0.322581	18.2435	20.1613	2.95806	2.77419
LSD (0.05)	1.09	1.03	3.1	4.4	3.4	26.5	15.9	0.07	3.9	25.8	0.15	25.2	1.8	2	2.3	0.7	0.8
MSe	0.46	0.41	3.7	7.6	4.6	270.4	97.9	0	5.8	256.9	0.01	245.3	1.2	1.5	2	0.2	0.2
CV	18.92	17.8	3.1	4.4	260.4	8.8	11.2	9.22	373	78.1	10.12	52.2	512.2	6.7	7	15	17.2
Heritability	0.43		0.9	0.9	0.3	0.3	0.7	0.79	0.1	0.7	0.38	0.7	0.3	0.8	0	0.3	0.6
p	0	0	0	0	0	0.004	0	0	0.141	0	0	0	0.003	0	0.427	0	0
p	***	***	***	***	***	**	***	***	ns	***	***	***	**	***	ns	***	***
Replications	3	3	3	3	3	3	3	3	3	3	3	3	3	3	3	3	3

## Sheet: Table S7_Opt_Kitale
Supplementary Table S6. Analysis of Variance and Mean Performance of Testcross Hybrids from Recurrent Parent, Donor Parent, and Introgression Lines for Grain Yield and Agronomic Traits under Optimum Conditions in Kitale, Kenya
	Grain Yield	Anthesis	Days to	ASI	Plant	Ear	Ear	Root	Stem	Ears/	GLS	Common rust	TLB	Grain	Num
	FW	Date	Silk		Height	Height	Position	Lodging	Lodging	Plant				Moisture	Plants
Pedigree (Line + tester)	t/ha	d	d	d	cm	cm	0-1	%	%	#	1-5	1-5	1-5	%	#
CML543 + CKDHL120918	7.9	85	85	0	247	123	0.5	4	6	1	1	2.2	2.8	20	17.7
CML543 + CKDHL120918	6.8	85	86	1	255	137	0.5	2	5	1	1.3	2.7	3.2	22.5	15
CML543 + CKDHL120918	6.5	84	85	1	253	137	0.6	14	18	1	1	2.3	3	21.2	17
CML543 + CKDHL120918	4.6	76	76	0	254	136	0.5	13	25	1	1.8	3	3.3	18.7	19
CML202 + CKDHL120918	5	85	85	0	232	115	0.5	4	2	1	1	2.3	3.5	19.1	17
CML202 + CKDHL120918	5.7	85	86	1	238	116	0.5	0	6	1	1	2.5	3.3	21.3	19
(CML202*5/CML543):B>0113>0302>0261>0292-1113 + CKDHL120918	5.7	85	85	0	245	120	0.5	0	17	1	1.3	2.3	3.3	19.6	16
(CML202*5/CML543):B>0113>0302>0261>0292-1127 + CKDHL120918	5.1	84	84	0	248	122	0.5	0	22	1	1	1.8	3.2	19.2	18
(CML202*5/CML543):B>0113>0302>0261>0292-1131 + CKDHL120918	5	83	85	2	253	127	0.5	0	14	0.9	1	2.5	3.5	18.4	18.3
CML489 + CKDHL120918	4.4	83	81	-2	244	122	0.5	11	30	1	1.7	2.8	2.3	20.3	14
CML489 + CKDHL120918	4.7	83	82	-1	241	121	0.5	22	32	1.2	1	2	2.7	21.8	15.3
(CML489*5/CML543):B>0187>0235>0232>0274-1131 + CKDHL120918	6.3	83	82	-1	249	129	0.5	20	2	1	1	2.7	2.7	20	20
(CML489*5/CML543):B>0187>0235>0232>0274-1142 + CKDHL120918	4.9	79	78	0	252	127	0.5	27	6	1	1	3	3.2	20.1	17
CML546 + CKDHL120918	6.8	77	77	0	241	131	0.5	20	16	1.1	1	2.7	3	21.1	17
CML546 + CKDHL120918	6.5	78	78	1	235	122	0.5	15	36	1.1	1	2.7	3	20.9	17
(CML546*5/CML543):B>0127>0034>0040>0060-1219 + CKDHL120918	7.6	79	79	0	253	125	0.5	14	21	0.9	1	2.8	3.2	18.2	19.3
(CML546*5/CML543):B>0004>0233>0208>0228-1151 + CKDHL120918	7.6	78	79	1	243	124	0.5	23	0	1	1	3.3	2.8	18.7	20
CML574 + CKDHL120918	6	85	85	0	259	137	0.5	2	8	1	1.3	3.2	3	23.5	18
CML574 + CKDHL120918	6.8	85	85	-1	244	126	0.5	16	0	0.9	1	3.2	3	21.6	18
CML574 + CKDHL120918	6.7	85	85	0	259	127	0.5	5	3	1.1	1	3	3.2	20.2	20
CML574 + CKDHL120918	4.3	85	84	-1	248	122	0.5	0	10	1	1	3.2	2.7	21.4	17.7
(CML574*5/CML543):B>0154>0157>0168>0327-1086 + CKDHL120918	6.5	86	87	1	251	136	0.5	0	0	1	1	3	3.3	21.8	18.3
CZL052 + CKDHL120918	6	80	79	-1	243	126	0.5	12	23	1	1	2.8	3	19.5	17.7
CZL052 + CKDHL120918	5.7	81	80	-1	249	126	0.5	12	21	1.1	1	2.7	2.8	19.1	15.7
(CZL052*3/CML543):B>0050>0080>0098>0092-1044 + CKDHL120918	5.7	80	80	0	234	125	0.5	17	48	1.2	1	2.7	3.3	21.4	16.3
(CZL052*3/CML543):B>0050>0077>0063>0048-1151 + CKDHL120918	6.1	78	79	1	236	125	0.5	37	33	1	1	3.2	3.2	19.2	18
CLYCR034 + CKDHL120918	6	86	85	0	245	134	0.6	13	20	0.9	1.3	3.2	3	21.3	17.3
CLYCR034 + CKDHL120918	6.4	86	87	1	256	140	0.6	11	3	1	1.3	3	2.8	22.8	15
(CLYCR034*5/CML543):B>0103>0035>0055>0062-1018 + CKDHL120918	7.6	84	85	1	253	134	0.5	18	7	1	1	2.7	3.2	17.4	17.7
(CLYCR034*5/CML543):B>0130>0045>0072>0110-1057 + CKDHL120918	7.2	83	84	0	252	135	0.6	12	13	0.9	1.2	3	3	19.8	20
(CLYCR034*5/CML543):B>0150>0224>0243>0293-1186 + CKDHL120918	6.4	86	87	1	252	130	0.5	9	5	0.9	1	3.2	3.3	22.1	18
CML444 + CKDHL120918	7.1	85	85	0	269	139	0.5	0	7	0.9	1.3	2.7	2.2	21.5	20.7
CML444 + CKDHL120918	7.2	85	83	-2	273	142	0.5	7	6	1	1.3	3	2.5	19.8	19
CML444 + CKDHL120918	6.3	85	96	10	273	139	0.5	0	11	0.9	1	2.3	2.7	19.6	19.7
(CML444*5/CML543):B>0113>0220>0289>0297-1154 + CKDHL120918	6.8	85	83	-2	279	144	0.5	0	2	1	1	2.2	2.3	21.3	15.3
(CML444*5/CML574):B>0022>0117>0093>0082-1096 + CKDHL120918	8	86	86	0	280	147	0.5	0	8	1	1.2	2.7	2.5	21	18
(CML444*5/CML574):B>0052>0064>0042>0024-1052 + CKDHL120918	6.8	85	84	-1	255	134	0.5	13	4	1	1.3	2.7	2.7	18.7	15.7
CML507 + CKDHL120918	3.3	74	75	1	256	135	0.5	0	58	0.9	1.3	2.3	4	19.1	18
(CML507*5/CLRCY034):B>0014>0057>0065>0074-1035 + CKDHL120918	4.6	75	76	1	253	136	0.5	0	65	1	1.3	3.3	4	22.8	19.7
CLYN261 + CKDHL120312	5.1	82	82	0	247	121	0.5	10	8	1.1	1	3.2	3.7	19.1	15.7
(CML312*5/CLYN261):B>0186>0158>0191>0211-1279 + CKDHL120312	5.5	75	75	0	283	141	0.5	2	10	1	2	3.3	3.2	19.1	17.7
(CML312*5/CLYN261):B>0214>0108>0141>0141-1155 + CKDHL120312	5	78	77	-1	266	138	0.5	0	19	1	1.7	3	2.8	19	19.3
(CML312*5/CLYN261):B>0043>0032>0037>0050-1065 + CKDHL120312	4.9	77	77	0	271	135	0.5	3	0	0.9	2	3	3	18.9	20
CML540 + CKDHL120312	6.4	76	76	0	249	127	0.5	2	2	1	1.3	3.2	3.7	19.9	18.7
CML540 + CKDHL120312	6.1	76	76	-1	259	132	0.5	4	0	1.1	1	3.3	3.3	20	19
(CML540*5/CLYN261):B>0104>0186>0191>0259-1271 + CKDHL120312	5.6	73	73	0	239	123	0.5	0	6	0.9	1.7	3.2	3.7	19	17.3
(CML540*5/CLYN261):B>0095>0167>0171>0242-1195 + CKDHL120312	5.3	75	75	0	262	114	0.5	0	13	0.9	1.3	3.3	3	18.9	18
CML544 + CKDHL120312	6.7	75	75	0	269	136	0.5	6	24	1	2	3.2	3	17.9	18.7
DTPYF46 + CKDHL120312	2.9	78	78	-1	227	115	0.5	11	18	1	1.3	3.7	3.5	20.8	14.3
DTPYF46 + CKDHL120312	6.2	76	76	0	255	124	0.5	2	54	0.9	1.7	3.3	3.5	18.7	17.7
DTPYF46 + CKDHL120312	3.9	76	76	1	258	125	0.5	8	43	1	2	3.2	3.7	18	19
CML539 + CKDHL120312	4	74	76	1	229	115	0.5	4	17	0.9	2	3	2.3	17.8	19.3
CML539 + CKDHL120312	4.3	75	76	0	245	124	0.5	0	5	1	2.2	3.2	2.7	19.5	20.3
CML539 + CKDHL120312	5.1	74	76	2	261	105	0.4	0	6	1	2	3.2	2.7	17.6	17.7
(CML539*5/DTPYF46):B>0055>0138>0150>0255-1112 + CKDHL120312	5.9	72	73	1	260	114	0.5	0	5	1	2	3.3	2.7	18.2	20.7
(CML539*5/DTPYF46):B>0055>0142>0166>0274-1124 + CKDHL120312	4.9	74	75	1	230	120	0.5	0	11	1	1.7	3.2	2.3	18.2	18
(CML539*5/DTPYF46):B>0087>0080>0094>0189-1072 + CKDHL120312	6.5	75	76	1	241	116	0.5	2	6	1	2	3.2	2	17.6	19.7
DUMA43	3.6	75	80	5	248	122	0.5	0	4	0.8	1.7	2.7	2	21.8	18.7
DK8031	6.3	78	80	2	264	129	0.5	10	2	0.9	1	2	1.7	19.9	17
PH3253	7.2	81	83	1	258	135	0.5	11	3	1	1.3	2	2	18.9	19.7
WE5135	6	77	78	1	252	134	0.5	10	5	1	2	2.3	2.3	18.2	20.3
CKMLN150073	9.4	86	85	-1	294	149	0.5	22	8	1.2	1	1.7	1.3	21.9	21.3
Mean	5.89355	80.3226	80.7581	0.370968	252.726	128.5	0.504839	7.74194	14.2258	0.991935	1.31935	2.83226	2.93226	19.9177	18.0403
LSD (0.05)	2.55	2.9	3.7	3	24	18.4	0.08	16.6	20.1	0.16	0.6	0.8	2.1	3.3	4.1
MSe	2.5	3.3	5.2	3.5	217	129.8	0	106.4	155.7	0.01	0.1	0.3	1.7	4.1	6.5
CV	26.12	2.3	2.9	772.6	6	8.8	9.64	174.3	98.2	9.72	24.5	19	42.6	10.3	14
Heritability	0.64	0.9	0.9	0.3	0.7	0.5	0.03	0.4	0.8	0.18	0.8	0.7	0.3	0.4	0.3
p	0	0	0	0.001	0	0	0.461	0	0	0.04	0	0	0	0	0.005
p	***	***	***	**	***	***	ns	***	***	*	***	***	***	***	**
Replications	3	3	3	3	3	3	3	3	3	3	3	3	3	3	3

## Sheet: Table S8_Opt_Thika
Supplementary Table S6. Analysis of Variance and Mean Performance of Testcross Hybrids from Recurrent Parent, Donor Parent, and Introgression Lines for Grain Yield and Agronomic Traits under Optimum Conditions in Thika, Kenya
	Grain Yield	Anth	Days to	ASI	Plant	Ear	Ear	Lodging		Ears/	Ear	GLS	Common rust	TLB	Num	Ear	Plant
	FW	Date	Silk		Height	Height	Position	Root	Stem	Plant	Rot				Plants	Aspect	Aspect
Pedigree (Line + tester)	t/ha	d	d	d	cm	cm	0-1	%	%	#	%	1-5	1-5	1-5	#	1-5	1-5
CML543 + CKDHL120918	5.2	93	92	-2	216	107	0.5	0	0	0.9	8	1	1	1.6	19.8	2.5	2.9
CML543 + CKDHL120918	3.5	92	94	1	218	108	0.5	0	0	0.9	2	1	1	1.6	17.4	2.5	2.6
CML543 + CKDHL120918	3.5	94	96	1	212	104	0.5	0	0	1	-1	1	1	1.6	17.3	2.5	2.6
CML543 + CKDHL120918	3.4	79	77	-2	215	118	0.6	0	2	1	0	0.9	1	1.5	17	2.8	2.4
CML202 + CKDHL120918	3.4	89	91	2	192	90	0.5	0	0	1	0	1.3	1	1.9	17.9	2.2	2
CML202 + CKDHL120918	2.3	92	103	11	189	91	0.5	0	0	1	0	1	1	1.9	16.6	2.3	2.5
(CML202*5/CML543):B>0113>0302>0261>0292-1113 + CKDHL120918	3	92	96	4	199	91	0.4	0	0	1	0	1	1	2.2	17.9	2.3	2.5
(CML202*5/CML543):B>0113>0302>0261>0292-1127 + CKDHL120918	3.5	89	88	-1	198	89	0.5	0	0	1	0	1.3	1	1.9	19.3	2.2	2.1
(CML202*5/CML543):B>0113>0302>0261>0292-1131 + CKDHL120918	3.4	89	91	2	187	85	0.5	2	0	1.1	0	1.3	1	1.9	18.6	2.3	2.5
CML489 + CKDHL120918	3.1	87	85	-2	202	94	0.5	0	0	1	3	1	1	1.5	15.5	2.2	1.9
CML489 + CKDHL120918	3.4	87	84	-4	205	92	0.5	0	0	1	5	1	1	1.9	16.7	2.2	2.1
(CML489*5/CML543):B>0187>0235>0232>0274-1131 + CKDHL120918	3.3	84	82	-3	212	101	0.5	0	0	1	0	1	1	1.9	17.9	2.2	2.1
(CML489*5/CML543):B>0187>0235>0232>0274-1142 + CKDHL120918	3.3	85	83	-2	209	100	0.5	0	0	0.9	0	1	1	1.5	19.1	2.2	2.1
CML546 + CKDHL120918	3.8	82	80	-2	213	98	0.5	2	0	1.1	0	1	1	1.5	17.2	2.3	1.9
CML546 + CKDHL120918	3.8	82	79	-2	211	103	0.5	0	0	1	0	1	1	1.5	17.3	2.2	2.1
(CML546*5/CML543):B>0127>0034>0040>0060-1219 + CKDHL120918	4.2	82	80	-2	217	104	0.5	0	0	0.9	0	1	1	1.9	17.9	2.2	2.1
(CML546*5/CML543):B>0004>0233>0208>0228-1151 + CKDHL120918	3.4	83	81	-2	199	93	0.4	2	0	1.1	2	1	1	1.9	16.5	2.3	2.1
CML574 + CKDHL120918	2.8	92	94	1	200	88	0.4	0	0	1	-1	1	1	1.2	16.1	2.8	2.6
CML574 + CKDHL120918	3.7	91	91	-1	220	101	0.5	0	0	0.9	-1	1	1	1.2	16.7	2.2	2.4
CML574 + CKDHL120918	4.1	91	88	-3	214	102	0.5	0	0	0.9	3	1.3	1	1.5	18.3	2	2
CML574 + CKDHL120918	4.3	91	89	-2	222	115	0.5	0	0	1	0	0.9	1	1.5	19.6	2.3	2.2
(CML574*5/CML543):B>0154>0157>0168>0327-1086 + CKDHL120918	3.8	93	90	-3	218	115	0.5	0	0	1	0	1	1	1.5	16.7	2.2	2
CZL052 + CKDHL120918	4.4	86	84	-2	213	102	0.5	0	0	1.1	0	1	1	1.9	16.9	2.2	2.3
CZL052 + CKDHL120918	3.5	85	84	-1	210	106	0.5	2	0	1	0	1	1	1.9	15.9	2.2	2.1
(CZL052*3/CML543):B>0050>0080>0098>0092-1044 + CKDHL120918	4.1	87	84	-4	209	111	0.5	0	0	1	0	1	1	1.5	19.2	2.2	2.3
(CZL052*3/CML543):B>0050>0077>0063>0048-1151 + CKDHL120918	3	86	84	-2	201	104	0.5	0	0	1	0	1	1	1.5	18.2	2.7	2.5
CLYCR034 + CKDHL120918	3.9	92	88	-4	217	99	0.5	0	0	1	0	1	1	1.5	16.3	2.2	2.1
CLYCR034 + CKDHL120918	3.6	93	90	-3	224	113	0.5	0	0	1.1	4	1	1	1.5	16	2.3	2.1
(CLYCR034*5/CML543):B>0103>0035>0055>0062-1018 + CKDHL120918	3.5	94	94	0	223	118	0.5	0	0	1	1	1	1	1.5	17.5	2.3	2.3
(CLYCR034*5/CML543):B>0130>0045>0072>0110-1057 + CKDHL120918	4.1	94	92	-1	219	112	0.5	0	0	1	0	1	1	1.2	20.5	2.2	1.9
(CLYCR034*5/CML543):B>0150>0224>0243>0293-1186 + CKDHL120918	3.6	94	94	-1	227	123	0.5	0	0	0.9	0	1	1	1.9	19.5	2	1.9
CML444 + CKDHL120918	4.2	91	88	-3	218	112	0.5	4	3	1.1	-1	1	1	1.9	20.5	2.5	2.2
CML444 + CKDHL120918	4	92	88	-4	224	124	0.6	0	0	1	-1	1	1	1.9	18.3	2	1.9
CML444 + CKDHL120918	4.2	91	89	-2	229	119	0.5	0	0	1	1	1.3	1	1.6	17.4	2.3	2.1
(CML444*5/CML543):B>0113>0220>0289>0297-1154 + CKDHL120918	3	90	87	-4	226	122	0.5	0	0	1	-1	1	1	1.6	18.4	2	1.9
(CML444*5/CML574):B>0022>0117>0093>0082-1096 + CKDHL120918	3.9	94	92	-3	222	112	0.5	0	0	0.9	-1	1.3	1	1.9	17.3	2.2	1.9
(CML444*5/CML574):B>0052>0064>0042>0024-1052 + CKDHL120918	3.4	91	86	-5	225	115	0.5	0	0	0.9	2	1	1	1.9	16.4	2.7	2.2
CML507 + CKDHL120918	3.2	79	77	-3	223	113	0.5	0	0	0.9	2	1	1	1.5	18.5	2.8	2.4
(CML507*5/CLRCY034):B>0014>0057>0065>0074-1035 + CKDHL120918	3.3	79	78	-1	213	112	0.5	2	0	1.1	0	0.9	1	1.8	16.8	2.7	2.6
CLYN261 + CKDHL120312	3.3	81	79	-3	216	98	0.5	0	4	1	0	1	1	1.9	14.1	2.5	2.4
(CML312*5/CLYN261):B>0186>0158>0191>0211-1279 + CKDHL120312	4.5	80	77	-3	250	117	0.5	0	0	1	0	0.9	1	1.8	20.5	2.3	2
(CML312*5/CLYN261):B>0214>0108>0141>0141-1155 + CKDHL120312	4.3	80	78	-2	250	119	0.5	0	0	1	0	0.9	1	1.8	21.3	2.3	2
(CML312*5/CLYN261):B>0043>0032>0037>0050-1065 + CKDHL120312	3.9	80	77	-3	233	109	0.5	0	0	1	0	1.3	1	1.8	18.2	2.5	2
CML540 + CKDHL120312	3.8	77	76	-1	200	69	0.4	0	0	1	3	1	1	1.9	19	2.5	2.4
CML540 + CKDHL120312	3.9	77	76	-2	203	80	0.4	0	0	1	-1	1	1	1.9	19.4	2.8	2.4
(CML540*5/CLYN261):B>0104>0186>0191>0259-1271 + CKDHL120312	3.3	78	77	-1	206	83	0.4	0	0	1.1	1	0.9	1	1.8	18.4	2.5	2.4
(CML540*5/CLYN261):B>0095>0167>0171>0242-1195 + CKDHL120312	4.3	77	76	-1	218	91	0.4	0	0	1	0	1.6	1	1.5	18.1	2.3	2
CML544 + CKDHL120312	4.2	80	78	-2	223	108	0.5	4	2	1	1	0.9	1	1.5	19.3	2.3	2
DTPYF46 + CKDHL120312	2.8	77	76	-1	207	92	0.5	0	0	1.1	0	1.3	1	1.5	16.7	2.5	2.1
DTPYF46 + CKDHL120312	3.4	77	76	-2	224	95	0.4	0	2	1	0	0.9	1	1.5	18.2	2.7	2.4
DTPYF46 + CKDHL120312	3.5	77	76	-2	216	101	0.5	0	0	1.1	0	0.9	1	1.1	18	2.7	2.5
CML539 + CKDHL120312	3.4	79	79	0	196	83	0.4	0	0	1.1	0	0.9	1	1.8	15.3	2.3	2.6
CML539 + CKDHL120312	4.4	78	77	-1	204	87	0.4	0	0	1	0	0.9	1	1.5	20.8	2.5	2.5
CML539 + CKDHL120312	4	78	78	-1	201	85	0.4	0	0	1.1	0	0.9	1	1.5	16.3	2.5	2.4
(CML539*5/DTPYF46):B>0055>0138>0150>0255-1112 + CKDHL120312	3.7	78	77	-1	192	88	0.5	0	0	1	0	0.9	1	1.5	18.8	2.5	2.6
(CML539*5/DTPYF46):B>0055>0142>0166>0274-1124 + CKDHL120312	4.1	78	77	-1	204	90	0.4	0	0	1	0	0.9	1	1.5	19.1	2.7	2.4
(CML539*5/DTPYF46):B>0087>0080>0094>0189-1072 + CKDHL120312	4	77	76	-1	203	85	0.4	0	1	1.2	0	0.9	1	1.8	17.8	2.5	2.4
DUMA43	3.3	81	82	1	214	85	0.4	8	0	1	2	0.9	1	2.1	19	2.7	2.4
DK8031	2.8	81	82	1	231	114	0.5	8	0	0.9	15	1.3	1	1.9	16.6	3	2.9
PH3253	3.7	87	87	0	214	109	0.5	4	12	1	10	1.3	1	2.1	18.8	3	2.9
WE5135	4.1	81	79	-2	209	100	0.5	2	2	0.9	0	1	1	1.9	19.2	2.5	2.4
CKMLN150073	4.5	92	91	-1	216	106	0.5	2	2	1.1	0	1.6	1	1.8	18.8	2.5	2.6
Mean	3.68226	85.2903	84.1935	-1.33871	213.242	101.613	0.480645	0.677419	0.483871	1.00484	0.919355	1.04194	1	1.68548	17.9452	2.40323	2.27581
LSD (0.05)	1.23	2.9	4.8	3.6	24.5	20.7	0.1	3	2.8	0.62	4.8	0.4	0.1	0.7	4.4	0.5	0.6
MSe	0.57	3.2	8.7	5	229.2	163.7	0	3.5	2.9	0.15	8.9	0.1	0	0.2	7.2	0.1	0.1
CV	20.26	2.1	3.5	-173	7.1	12.7	13.47	336.8	819	37.36	743.5	22.9	8.3	27.2	14.9	12.6	15.3
Heritability	0.203357	0.958265	0.872541	0.343772	0.497719	0.600355	0.274138	0.267355	0.264102	1.3936e-17	7.94775e-11	0.0532126	1.39687e-15	5.35308e-10	1.12808e-15	0.250605	0.186061
p	0.11	0	0	0	0	0	0.002	0.003	0.002	0.529	0.362	0.332	0.495	0.332	0.495	0.001	0.005
p	ns	***	***	***	***	***	**	**	**	ns	ns	ns	ns	ns	ns	**	**
Replications	3	3	3	3	3	3	3	3	3	3	3	3	3	3	3	3	3
